# Supplementary material for: Body temperature changes during simulated bacterial infection in a songbird: fever at night and hypothermia at day
Source: Oxford University Press journal article supplement (doi:10.1242/jeb.122150), 2015-01-01
Supplement: jeb122150supp.pdf [file jeb122150supp.pdf]

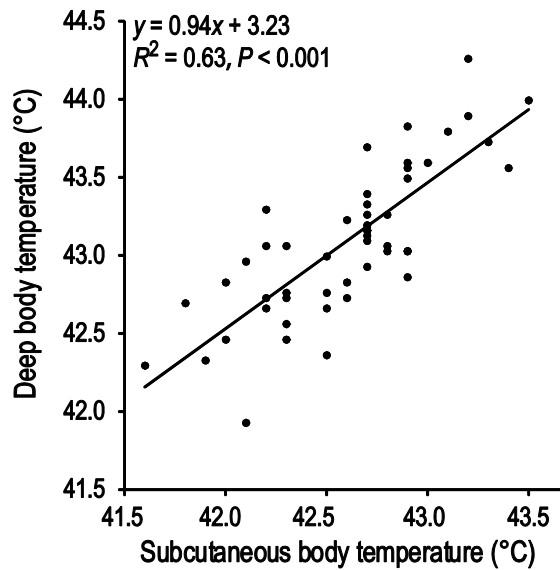

**Fig. 1.** The relationship between deep body temperature and subcutaneous body temperature in male zebra finches, measured simultaneously prior to experimental manipulation. We measured deep and subcutaneous body temperature simultaneously on each bird from a group in the morning before experimental manipulation in order to validate that the implants accurately reflected variation in deep body temperature. Deep body temperature was measured with a Testo 925 digital thermometer (Testo AG, Lenzkirch, Germany) with a standard Kapton® insulated type K (chromel--alumel) thermocouple (Ø 0.9 mm; ELFA AB, Järfälla, Sweden) inserted 12 mm through the cloaca (further insertion did not alter the temperature reading). Measurements of subcutaneous body temperature were obtained from the implanted PIT tags using a handheld racket antenna (Ø 17.5 cm; Destron Fearing) connected to an FS2001F ISO reader (Destron Fearing). The calibration revealed a strong positive linear relationship between deep body temperature and subcutaneous body temperature.

**Table S1.** Test statistics, degrees of freedom and resultant P-values for final models. Models in which variation in the dependent variable could not be predicted from any of the explanatory variables are not presented. The table also includes dose-specific model outputs of the body temperature response to a lipopolysaccharide (LPS) challenge during the day, and treatment-specific model outputs of the body temperature response to a LPS-challenge during the night.

| Model / Parameter                                     | F      | d.f.     | P       |
|-------------------------------------------------------|--------|----------|---------|
| <u>Responses to a LPS-challenge during the day:</u>   |        |          |         |
| Body temperature response:                            |        |          |         |
| LPS-dose                                              | 1.64   | 4, 45    | 0.18    |
| Time                                                  | 0.19   | 1, 1789  | 0.66    |
| Time <sup>2</sup>                                     | 17.13  | 1, 1789  | < 0.001 |
| LPS-dose × Time                                       | 3.15   | 4, 1789  | 0.014   |
| LPS-dose × Time <sup>2</sup>                          | 3.70   | 4, 1789  | 0.0053  |
| Control:                                              |        |          |         |
| Time                                                  | 0.072  | 1, 357   | 0.79    |
| Time <sup>2</sup>                                     | 3.90   | 1, 357   | 0.049   |
| 1 µg LPS kg <sup>-1</sup> :                           |        |          |         |
| Time                                                  | 54.86  | 1, 359   | < 0.001 |
| 10 µg LPS kg <sup>-1</sup> :                          |        |          |         |
| Time                                                  | 3.44   | 1, 358   | 0.065   |
| Time <sup>2</sup>                                     | 17.13  | 1, 358   | < 0.001 |
| 100 µg LPS kg <sup>-1</sup> :                         |        |          |         |
| Time                                                  | 0.065  | 1, 358   | 0.80    |
| Time <sup>2</sup>                                     | 8.34   | 1, 358   | 0.0041  |
| 1000 µg LPS kg <sup>-1</sup> :                        |        |          |         |
| Time                                                  | 55.00  | 1, 359   | < 0.001 |
| Temperature regression – maximum:                     |        |          |         |
| LPS-dose                                              | 4.53   | 1, 48    | 0.039   |
| Seed consumption day 1:                               |        |          |         |
| LPS-dose                                              | 19.81  | 1, 45    | < 0.001 |
| Group                                                 | 3.41   | 3, 45    | 0.025   |
| Seed consumption day 2:                               |        |          |         |
| LPS-dose                                              | 3.21   | 1, 46    | 0.080   |
| LPS-dose <sup>2</sup>                                 | 9.50   | 1, 46    | 0.0035  |
| Body mass gain day 1:                                 |        |          |         |
| LPS-dose                                              | 4.26   | 1, 45    | 0.045   |
| Initial body mass                                     | 7.08   | 1, 45    | 0.011   |
| Body mass loss night:                                 |        |          |         |
| Group                                                 | 11.50  | 3, 43    | < 0.001 |
| Body mass gain day 2:                                 |        |          |         |
| LPS-dose                                              | 4.33   | 1, 45    | 0.043   |
| LPS-dose <sup>2</sup>                                 | 6.75   | 1, 45    | 0.013   |
| <u>Responses to a LPS-challenge during the night:</u> |        |          |         |
| Body temperature response:                            |        |          |         |
| Treatment                                             | 4.49   | 1, 22    | 0.046   |
| Time                                                  | 477.10 | 1, 692   | < 0.001 |
| Time <sup>2</sup>                                     | 327.76 | 1, 692   | < 0.001 |
| Treatment × Time                                      | 37.80  | 1, 692   | < 0.001 |
| Treatment × Time <sup>2</sup>                         | 44.86  | 1, 692   | < 0.001 |
| Control:                                              |        |          |         |
| Time                                                  | 534.71 | 1, 346   | < 0.001 |
| Time <sup>2</sup>                                     | 419.80 | 1, 346   | < 0.001 |
| 100 µg LPS kg <sup>-1</sup> :                         |        |          |         |
| Time                                                  | 97.54  | 1, 347.9 | < 0.001 |
| Time <sup>2</sup>                                     | 51.56  | 1, 348.6 | < 0.001 |
